# Supplementary material
Source: MDPI journal article supplement (https://www.mdpi.com/1424-2818/13/9/434)
Supplement: s1 [file s1]

Supplementary Table SI: Table of voucher numbers, sample numbers, GenBank numbers and sampling localities. Museum acronyms are: LSU, Louisiana State University Museum of Natural Sciences; MBM, Marjorie Barrick Museum (collection now housed at UWBM); MVZ, Museum of Vertebrate Zoology, UC-Berkeley; TCWC, Texas Cooperative Wildlife Collection (Biodiversity Research and Teaching Collections), Texas A&M University; USNM, U.S. National Museum, Washington, D.C.

| Species                        | Museum No.  | Sample ID | GenBank ND2 | Country      |               | Locality              | Latitude | Longitude |
|--------------------------------|-------------|-----------|-------------|--------------|---------------|-----------------------|----------|-----------|
| <i>Curruca subcoerulea</i>     | MBM 5733    | GAV1157   | MZ848208    | South Africa | Northwest     | Vorstershoop, 10 km W | -25.85   | 22.9333   |
|                                | MBM 5732    | GAV1158   | MZ848209    | South Africa | Northwest     | Vorstershoop, 10 km W | -25.85   | 22.9333   |
|                                | MBM 8195    | GAV1846   | MZ848210    | South Africa | Northern Cape | Kuruman, 45 km S      | -27.85   | 23.55     |
|                                | MBM 11953   | GAV2660   | MZ848211    | South Africa | Free State    | Kimberley, 25 km S    | -28.8    | 25.1333   |
|                                | MBM 12040   | GAV2679   | MZ848212    | South Africa | Northern Cape | Magersfontein         | -28.9667 | 24.7311   |
|                                | MBM 12366   | GAV2696   | MZ848213    | South Africa | Northern Cape | Magersfontein         | -28.9667 | 24.7311   |
|                                | MBM 12367   | GAV2725   | MZ848214    | South Africa | Northern Cape | Magersfontein         | -28.9667 | 24.7311   |
|                                | MBM 12629   | GAV2746   | MZ848215    | South Africa | Free State    | Kimberley, 25 km E    | -28.8    | 25.1333   |
|                                | MBM 12630   | GAV2761   | MZ848216    | South Africa | Free State    | Kimberley, 25 km E    | -28.8    | 25.1333   |
|                                | TCWC 14988  | GAV3191   | MZ848217    | South Africa | Free State    | Kimberley, 10 km NE   | -28.6331 | 24.7983   |
|                                | TCWC 14992  | GAV3207   | MZ848218    | South Africa | Free State    | Kimberley, 10 km NE   | -28.6331 | 24.7983   |
|                                | TCWC 14989  | GAV3223   | MZ848219    | South Africa | Free State    | Kimberley, 10 km NE   | -28.6331 | 24.7983   |
|                                | TCWC 14991  | GAV3246   | MZ848220    | South Africa | Northern Cape | Kimberley, 25 km S    | -28.8    | 25.1333   |
|                                | TCWC 14987  | GAV3256   | MZ848221    | South Africa | Northern Cape | Kimberley, 25 km S    | -28.8    | 25.1333   |
|                                | TCWC 15599  | GAV3281   | MZ848222    | South Africa | Northern Cape | Kimberley, 10 km NE   | -28.6331 | 24.7983   |
|                                | TCWC 15598  | GAV3291   | MZ848223    | South Africa | Northern Cape | Kimberley, 10 km NE   | -28.6331 | 24.7983   |
|                                | TCWC 15600  | GAV3307   | MZ848224    | South Africa | Northern Cape | Kimberley, 10 km NE   | -28.6331 | 24.7983   |
|                                | TCWC 15596  | GAV3338   | MZ848225    | South Africa | Northern Cape | Kimberley, 10 km NE   | -28.6331 | 24.7983   |
|                                | TCWC 15597  | GAV3339   | MZ848226    | South Africa | Northern Cape | Kimberley, 10 km NE   | -28.6331 | 24.7983   |
|                                | TCWC 16894  | GAV3464   | MZ848227    | South Africa | Limpopo       | Munnik, 13 km NW      | -23.5931 | 29.7839   |
|                                | TCWC 16889  | GAV3499   | MZ848228    | South Africa | Limpopo       | Munnik, 13 km NW      | -23.5931 | 29.7839   |
|                                | TCWC 16896  | GAV3504   | MZ848229    | South Africa | Limpopo       | Munnik, 13 km NW      | -23.5931 | 29.7839   |
|                                | TCWC 16890  | GAV3535   | MZ848230    | South Africa | Limpopo       | Munnik, 13 km NW      | -23.5931 | 29.7839   |
|                                | TCWC 16893  | GAV3539   | MZ848231    | South Africa | Limpopo       | Munnik, 13 km NW      | -23.5931 | 29.7839   |
|                                | TCWC 16892  | GAV3571   | MZ848232    | South Africa | Limpopo       | Munnik, 13 km NW      | -23.5931 | 29.7839   |
|                                | MBM 7968    | JK00-098  | MZ848233    | South Africa | Northwest     | Vorstershoop, 10 km W | -25.85   | 22.9333   |
|                                | MBM 8194    | JK00-199  | MZ848234    | South Africa | Northwest     | Vorstershoop, 10 km W | -25.85   | 22.9333   |
|                                | MBM 8354    | JK00-230  | MZ848235    | South Africa | Northwest     | Vorstershoop, 10 km W | -25.85   | 22.9333   |
|                                | MBM 8352    | JK00-242  | MZ848236    | South Africa | Northwest     | Vorstershoop, 10 km W | -25.85   | 22.9333   |
|                                | MBM 8353    | JK00-243  | MZ848237    | South Africa | Northwest     | Vorstershoop, 10 km W | -25.85   | 22.9333   |
|                                | TCWC 17572  | GAV3717   | MZ848238    | South Africa | Limpopo       | Munnik, 13 km NW      | -23.5931 | 29.7839   |
|                                | TCWC 17574  | GAV3722   | MZ848239    | South Africa | Limpopo       | Munnik, 13 km NW      | -23.5931 | 29.7839   |
|                                | TCWC 17573  | GAV3744   | MZ848240    | South Africa | Limpopo       | Munnik, 13 km NW      | -23.5931 | 29.7839   |
|                                | TCWC 17571  | JWH334    | MZ848241    | South Africa | Limpopo       | Munnik, 13 km NW      | -23.5931 | 29.7839   |
|                                | TCWC 17570  | GAV3765   | MZ848242    | South Africa | Free State    | Rouxville             | -30.5086 | 26.6136   |
|                                | TCWC 17569  | GAV3802   | MZ848243    | South Africa | Free State    | Rouxville             | -30.5086 | 26.6136   |
|                                | TCWC 17578  | GAV3835   | MZ848244    | South Africa | Northern Cape | Ghaap Plateau         | -28.4189 | 24.0733   |
|                                | TCWC 17577  | GAV3845   | MZ848245    | South Africa | Northern Cape | Ghaap Plateau         | -28.4189 | 24.0733   |
|                                | TCWC 17575  | GAV3846   | MZ848246    | South Africa | Northern Cape | Ghaap Plateau         | -28.4189 | 24.0733   |
|                                | TCWC 17576  | GAV3847   | MZ848247    | South Africa | Northern Cape | Ghaap Plateau         | -28.4189 | 24.0733   |
|                                | USNM B28737 | same      | MZ848205    | Namibia      | Omaheke       | Aminuis               | -23.85   | 19.5666   |
|                                | USNM B28776 | same      | MZ848202    | Namibia      | Omaheke       | Aminuis               | -23.85   | 19.5666   |
|                                | USNM B28754 | same      | MZ848200    | Namibia      | Omaheke       | Aminuis               | -23.85   | 19.5666   |
|                                | USNM B28756 | same      | MZ848203    | Namibia      | Omaheke       | Aminuis               | -23.85   | 19.5666   |
|                                | USNM B28765 | same      | MZ848207    | Namibia      | Omaheke       | Aminuis               | -23.85   | 19.5666   |
|                                | USNM B28767 | same      | MZ848204    | Namibia      | Omaheke       | Aminuis               | -23.85   | 19.5666   |
|                                | USNM B29232 | same      | MZ848198    | Namibia      | Karas         | Kolka                 | -27.6    | 16.8833   |
|                                | USNM B29238 | same      | MZ848199    | Namibia      | Karas         | Kolka                 | -27.6    | 16.8833   |
|                                | USNM B28739 | same      | MZ848206    | Namibia      | Omaheke       | Aminuis               | -23.85   | 19.5666   |
|                                | USNM B28740 | same      | MZ848201    | Namibia      | Omaheke       | Aminuis               | -23.85   | 19.5666   |
| <i>Laniarius atrococcineus</i> | MBM 5836    | GAV1153   | MZ848248    | South Africa | Northwest     | Vorstershoop, 10 km W | -25.85   | 22.9333   |
|                                | MBM 5835    | GAV1154   | MZ848249    | South Africa | Northwest     | Vorstershoop, 10 km W | -25.85   | 22.9333   |
|                                | MBM 12648   | GAV2763   | MZ848250    | South Africa | Free State    | Kimberley, 25 km E    | -28.8    | 25.1333   |
|                                | MBM 12649   | GAV2764   | MZ848251    | South Africa | Free State    | Kimberley, 25 km E    | -28.8    | 25.1333   |
|                                | TCWC 15579  | GAV3280   | MZ848252    | South Africa | Northern Cape | Kimberley, 10 km NE   | -28.6331 | 24.7983   |
|                                | TCWC 15580  | GAV3294   | MZ848253    | South Africa | Northern Cape | Kimberley, 10 km NE   | -28.6331 | 24.7983   |
|                                | TCWC 15578  | GAV3329   | MZ848254    | South Africa | Northern Cape | Kimberley, 10 km NE   | -28.6331 | 24.7983   |
|                                | TCWC 16949  | GAV3541   | MZ848255    | South Africa | Limpopo       | Munnik, 13 km NW      | -23.5931 | 29.7839   |
|                                | TCWC 16950  | GAV3610   | MZ848256    | South Africa | Limpopo       | Mopane                | -22.6194 | 29.8341   |
|                                | TCWC 16948  | GAV3641   | MZ848257    | South Africa | Limpopo       | Munnik, 13 km NW      | -23.5931 | 29.7839   |
|                                | MBM 7936    | JK00-087  | MZ848258    | South Africa | Northwest     | Vorstershoop, 10 km W | -25.85   | 22.9333   |
|                                | MBM 8174    | JK00-165  | MZ848259    | South Africa | Northwest     | Vorstershoop, 10 km W | -25.85   | 22.9333   |
|                                | MBM 8175    | JK00-204  | MZ848260    | South Africa | Northwest     | Vorstershoop, 10 km W | -25.85   | 22.9333   |
|                                | MBM 8172    | JK00-205  | MZ848261    | South Africa | Northwest     | Vorstershoop, 10 km W | -25.85   | 22.9333   |
|                                | MBM 8173    | JK00-206  | MZ848262    | South Africa | Northwest     | Vorstershoop, 10 km W | -25.85   | 22.9333   |
|                                | TCWC 16947  | TJH3143   | MZ848263    | South Africa | Limpopo       | Munnik, 13 km NW      | -23.5931 | 29.7839   |
|                                | TCWC 16951  | TJH3174   | MZ848264    | South Africa | Limpopo       | Mopane                | -22.6194 | 29.8341   |

|             |         |          |              |               |               |          |         |
|-------------|---------|----------|--------------|---------------|---------------|----------|---------|
| TCWC 17359  | GAV3719 | MZ848265 | South Africa | Limpopo       | Munnik        | -23.5931 | 29.7839 |
| TCWC 17360  | GAV3834 | MZ848266 | South Africa | Northern Cape | Ghaap Plateau | -28.4189 | 24.0733 |
| TCWC 17361  | JWH397  | MZ848267 | South Africa | Northern Cape | Ghaap Plateau | -28.4189 | 24.0733 |
| USNM B28738 | same    | MZ848268 | Namibia      | Omaheke       | Aminuis       | -23.85   | 19.5666 |
| USNM B28744 | same    | MZ848269 | Namibia      | Omaheke       | Aminuis       | -23.85   | 19.5666 |
| USNM B28743 | same    | MZ848270 | Namibia      | Omaheke       | Aminuis       | -23.85   | 19.5666 |
| USNM B28772 | same    | MZ848271 | Namibia      | Omaheke       | Aminuis       | -23.85   | 19.5666 |
| USNM B29420 | same    | MZ848272 | Namibia      | Erongo        | Tubusis       | -21.65   | 15.3833 |
| USNM B29372 | same    | MZ848273 | Namibia      | Khomas        | Nauzerus      | -25.85   | 16.4333 |
| TCWC 21574  | GAV3894 | MZ848274 | South Africa | Limpopo       | Venetia       | -22.2673 | 29.3307 |
| TCWC 21575  | GAV3895 | MZ848275 | South Africa | Limpopo       | Venetia       | -22.2673 | 29.3307 |
| TCWC 21591  | GAV3911 | MZ848276 | South Africa | Limpopo       | Venetia       | -22.2673 | 29.3307 |
| TCWC 21601  | GAV3921 | MZ848277 | South Africa | Limpopo       | Venetia       | -22.2673 | 29.3307 |

*Tricholaema leucomelas*

|              |          |          |              |               |                        |              |              |
|--------------|----------|----------|--------------|---------------|------------------------|--------------|--------------|
| TCWC 14982   | GAV3219  | MZ848290 | South Africa | Northern Cape | Kimberley, 5 km N      | -28.6331     | 24.7983      |
| TCWC 14981   | GAV3227  | MZ848291 | South Africa | Northern Cape | Kimberley, 5 km N      | -28.6331     | 24.7983      |
| TCWC 14980   | GAV3242  | MZ848284 | South Africa | Free State    | Kimberley, 10 km NE    | -28.6331     | 24.7983      |
| TCWC 15646   | GAV3265  | MZ848292 | South Africa | Northern Cape | Kimberley, 10 km NE    | -28.6331     | 24.7983      |
| TCWC 15645   | GAV3266  | MZ848293 | South Africa | Northern Cape | Kimberley, 10 km NE    | -28.6331     | 24.7983      |
| TCWC 15644   | GAV3267  | MZ848294 | South Africa | Northern Cape | Kimberley, 10 km NE    | -28.6331     | 24.7983      |
| TCWC 15647   | GAV3277  | MZ848295 | South Africa | Northern Cape | Kimberley, 10 km NE    | -28.6331     | 24.7983      |
| TCWC 16926   | GAV3502  | MZ848306 | South Africa | Limpopo       | Munnik, 13 km NW       | -23.5931     | 29.7839      |
| TCWC 16921   | GAV3518  | MZ848296 | South Africa | Limpopo       | Munnik, 13 km NW       | -23.5931     | 29.7839      |
| TCWC 16927   | GAV3519  | MZ848297 | South Africa | Limpopo       | Munnik, 13 km NW       | -23.5931     | 29.7839      |
| TCWC 16925   | GAV3542  | MZ848298 | South Africa | Limpopo       | Munnik, 13 km NW       | -23.5931     | 29.7839      |
| TCWC 16919   | GAV3588  | MZ848299 | South Africa | Limpopo       | Mopane                 | -22.6194     | 29.8341      |
| TCWC 16920   | TJH3067  | MZ848300 | South Africa | Limpopo       | Munnik, 13 km NW       | -23.5931     | 29.7839      |
| TCWC 16924   | TJH3118  | MZ848301 | South Africa | Limpopo       | Munnik, 13 km NW       | -23.5931     | 29.7839      |
| TCWC 16923   | TJH3128  | MZ848302 | South Africa | Limpopo       | Munnik, 13 km NW       | -23.5931     | 29.7839      |
| TCWC 16918   | TJH3177  | MZ848303 | South Africa | Limpopo       | Mopane                 | -22.6194     | 29.8341      |
| TCWC 16922   | TJH3183  | MZ848304 | South Africa | Limpopo       | Munnik, 13 km NW       | -23.5931     | 29.7839      |
| TCWC GAV3732 | same     | MZ848305 | South Africa | Limpopo       | Munnik, 13 km NW       | -23.5931     | 29.7839      |
| TCWC 17414   | GAV3772  | MZ848307 | South Africa | Free State    | Rouxville              | -30.5086     | 26.6136      |
| TCWC 17413   | GAV3793  | MZ848308 | South Africa | Free State    | Rouxville              | -30.5086     | 26.6136      |
| TCWC 17412   | GAV3797  | MZ848309 | South Africa | Free State    | Rouxville              | -30.5086     | 26.6136      |
| TCWC 17410   | JWH354   | MZ848310 | South Africa | Free State    | Rouxville              | -30.5086     | 26.6136      |
| TCWC 17411   | JWH365   | MZ848311 | South Africa | Free State    | Rouxville              | -30.5086     | 26.6136      |
| TCWC 17408   | GAV3808  | MZ848312 | South Africa | Northern Cape | Ghaap Plateau          | -28.4189     | 24.0733      |
| TCWC 17409   | GAV3825  | MZ848313 | South Africa | Northern Cape | Ghaap Plateau          | -28.4189     | 24.0733      |
| TCWC 17407   | JWH405   | MZ848314 | South Africa | Northern Cape | Ghaap Plateau          | -28.4189     | 24.0733      |
| UWBM 70367   | GAV 365  | MZ848315 | South Africa | Free State    | Springfontein          | -30.499      | 25.441       |
| UWBM 52762   | GAV 404  | MZ848316 | South Africa | Free State    | Springfontein          | -30.499      | 25.441       |
| UWBM 53106   | SVD 736  | MZ848317 | South Africa | Free State    | Springfontein          | -30.499      | 25.441       |
| FMNH 501425  | BCA 646  | MZ848318 | South Africa | Northern Cape | Alexander Bay          | -28.5533     | 16.5733      |
| FMNH 501531  | BCA 698  | MZ848319 | South Africa | Northern Cape | Springbok, Eendorn     | -29.733      | 18           |
| FMNH 501422  | BCA 609  | MZ848320 | South Africa | Northern Cape | Pniel                  | -28.58       | 24.43        |
| FMNH 501423  | BCA 656  | MZ848321 | South Africa | Northern Cape | Brandkaros             | -28.5533     | 16.5733      |
| FMNH 501424  | BCA 631  | MZ848322 | South Africa | Northern Cape | Alexander Bay          | -28.5533     | 16.5733      |
| FMNH 501426  | BCA 647  | MZ848323 | South Africa | Northern Cape | Alexander Bay          | -28.5533     | 16.5733      |
| LSU B34180   | same     | MZ848324 | South Africa | Free State    | 3 km W Vaal dam        | -26.9        | 28           |
| LSU B34219   | same     | MZ848325 | South Africa | Free State    | 9 km E Boshof          | -28.55       | 25.2333      |
| USNM B28863  | B28863   | MZ848326 | Namibia      | Karas         | Oas                    | -27.4953     | 19.2206      |
| USNM B28887  | B28887   | MZ848327 | Namibia      | Karas         | Oas                    | -27.4953     | 19.2206      |
| USNM B29458  | B29458   | MZ848328 | Namibia      | Erongo        | Otjongoro              | -20.8825     | 15.6013      |
| USNM B28871  | B28871   | MZ848329 | Namibia      | Karas         | Oas                    | -27.4953     | 19.2206      |
| USNM B29235  | B29235   | MZ848330 | Namibia      | Karas         | Kolka                  | -27.5975     | 16.8794      |
| USNM B29152  | B29152   | MZ848331 | Namibia      | Karas         | Sandfontein            | -28.8625     | 18.5522      |
| USNM B29390  | B29390   | MZ848332 | Namibia      | Khomas        | Nauzerus               | -25.8406     | 16.3367      |
| FMNH 453114  | same     | MZ848333 | South Africa | Free State    | Lindley, 11.2km NNE    | -27.7839     | 27.9453      |
| FMNH 453116  | same     |          | South Africa | Free State    | Ladybrand, 15.1km SW   | -29.2875     | 27.3619      |
| TCWC 21529   | GAV3849  | MZ848282 | South Africa | Limpopo       | Venetia                | -22.2673     | 29.3307      |
| TCWC 21539   | GAV3859  | MZ848278 | South Africa | Limpopo       | Venetia                | -22.2673     | 29.3307      |
| TCWC 21609   | GAV3929  | MZ848279 | South Africa | Limpopo       | Venetia                | -22.2673     | 29.3307      |
| TCWC 22412   | HLP 132  | MZ848281 | South Africa | Eastern Cape  | Graaff-Reinet          | -32.078      | 24.6786      |
| TCWC 22460   | HLP 340  | MZ848280 | South Africa | Eastern Cape  | Graaff-Reinet          | -32.078      | 24.6786      |
| TCWC 22461   | HLP 341  | MZ848289 | South Africa | Eastern Cape  | Graaff-Reinet          | -32.078      | 24.6786      |
| TCWC 22462   | HLP 342  | MZ848288 | South Africa | Eastern Cape  | Graaff-Reinet          | -32.078      | 24.6786      |
| TCWC 22394   | HLP 61   | MZ848287 | South Africa | Eastern Cape  | Graaff-Reinet          | -32.078      | 24.6786      |
| TCWC 22395   | HLP 62   | MZ848285 | South Africa | Eastern Cape  | Graaff-Reinet          | -32.078      | 24.6786      |
| TCWC 22406   | HLP 99   | MZ848286 | South Africa | Eastern Cape  | Graaff-Reinet          | -32.078      | 24.6786      |
| TCWC 22496   | SVD 5814 | MZ848283 | South Africa | Eastern Cape  | Graaff-Reinet          | -32.078      | 24.6786      |
| MVZ GO 67    | DW 24    | MZ848334 | South Africa | Free State    | 30 km NNW Bloemfontein | 28°50.655' S | 26°11.266' E |
| MVZ GO 71    | DW 25    | MZ848335 | South Africa | Free State    | 30 km NNW Bloemfontein | 28°50.655' S | 26°11.266' E |
| MVZ JF 515   | DW 26    | MZ848336 | South Africa | Eastern Cape  | 15 km from Grahamstown | 33.2983 S    | 26.5361 E    |
| MVZ JF 538   | DW 27    | MZ848337 | South Africa | Eastern Cape  | 15 km from Grahamstown | 33.2983 S    | 26.5361 E    |
| MVZ JF 803   | DW 28    | MZ848338 | South Africa | Eastern Cape  | 20 km from Tarkastdt   | 32.0394 S    | 26.2933 E    |

|             |       |          |              |               |                          |              |              |
|-------------|-------|----------|--------------|---------------|--------------------------|--------------|--------------|
| MVZ JF 841  | DW 29 | MZ848339 | South Africa | Eastern Cape  | 20 km from Tarkastdt     | 32.0394 S    | 26.2933 E    |
| MVZ JF 1188 | DW 30 | MZ848340 | South Africa | Free State    | 30 km NNW Bloemfontein   | 28.8336 S    | 26.1881 E    |
| MVZ JF 1191 | DW 31 | MZ848341 | South Africa | Free State    | 30 km NNW Bloemfontein   | 28.8336 S    | 26.1881 E    |
| MVZ JF 1196 | DW 32 | MZ848342 | South Africa | Free State    | 30 km NNW Bloemfontein   | 28.8336 S    | 26.1881 E    |
| MVZ JF 1198 | DW 33 | MZ848343 | South Africa | Free State    | 30 km NNW Bloemfontein   | 28.8336 S    | 26.1881 E    |
| MVZ JF 1313 | DW 34 | MZ848344 | South Africa | Free State    | 30 km E of Kimberley     | 28.8036 S    | 25.04 E      |
| MVZ JF 1318 | DW 35 | MZ848345 | South Africa | Free State    | 30 km E of Kimberley     | 28.8036 S    | 25.04 E      |
| MVZ JF 1324 | DW 36 | MZ848346 | South Africa | Free State    | 30 km E of Kimberley     | 28.8036 S    | 25.04 E      |
| MVZ JF 2029 | DW 37 | MZ848347 | South Africa | Western Cape  | Bontebok National Park   | 34.0778 S    | 20.4539 E    |
| MVZ JF 2034 | DW 38 | MZ848348 | South Africa | Western Cape  | "Close to Prince Albert" | 33.19 S      | 22.1008 E    |
| MVZ JF 2081 | DW 39 | MZ848349 | South Africa | Western Cape  | "Close to Prince Albert" | 33.19 S      | 22.1008 E    |
| MVZ JF 2177 | DW 40 | MZ848350 | South Africa | Western Cape  | "Beaufort West Site 2"   | 32.4056 S    | 22.5758 E    |
| MVZ JF 2179 | DW 41 | MZ848351 | South Africa | Western Cape  | "Beaufort West Site 2"   | 32.4056 S    | 22.5758 E    |
| MVZ JF 2206 | DW 42 | MZ848352 | South Africa | Western Cape  | "Beaufort West Site 2"   | 32.4056 S    | 22.5758 E    |
| MVZ JF 2279 | DW 43 | MZ848353 | South Africa | Northern Cape | Potfontein               | 30.2042 S    | 24.11 E      |
| MVZ JF 2283 | DW 44 | MZ848354 | South Africa | Northern Cape | Potfontein               | 30.2042 S    | 24.11 E      |
| MVZ JF 2285 | DW 45 | MZ848355 | South Africa | Northern Cape | Potfontein               | 30.2042 S    | 24.11 E      |
| MVZ JF 2359 | DW 46 | MZ848356 | South Africa | Northern Cape | "Kuruman Site 1"         | 27.4997 S    | 23.4472 E    |
| MVZ GO 83   | DW 47 | MZ848357 | South Africa | Free State    | 30 km NNW Bloemfontein   | 28°50.655' S | 26°11.266' E |
| MVZ GO 122  | DW 48 | MZ848358 | South Africa | Eastern Cape  | Aliwal North             | 30°39.407' S | 26°32.818' E |
| MVZ GO 130  | DW 49 | MZ848359 | South Africa | Eastern Cape  | Aliwal North             | 30°39.407' S | 26°32.818' E |
| MVZ GO 719  | DW 50 | MZ848360 | South Africa | Limpopo       | Munnik, 13 km NW         | 23.5931 S    | 29.7839 E    |
| MVZ GO 751  | DW 51 | MZ848361 | South Africa | Free State    | Rouxville                | 30.5086 S    | 26.6136 E    |
| MVZ GO 825  | DW 53 | MZ848362 | South Africa | Free State    | 11 km NNW of Wepener     | 29.57236 S   | 26.96956 E   |
| MVZ HS 91   | DW 66 | MZ848363 | South Africa | Northern Cape | Pofadder                 | 28.9906 S    | 19.6733 E    |
| MVZ HS 93   | DW 67 | MZ848364 | South Africa | Northern Cape | Pofadder                 | 28.9906 S    | 19.6733 E    |
| MVS HS 95   | DW 68 | MZ848365 | South Africa | Northern Cape | Pofadder                 | 28.9906 S    | 19.6733 E    |
