# Supplementary material
Source: MDPI journal article supplement (https://www.mdpi.com/1424-2818/13/9/434)
Supplement: s1 [file s1]

A

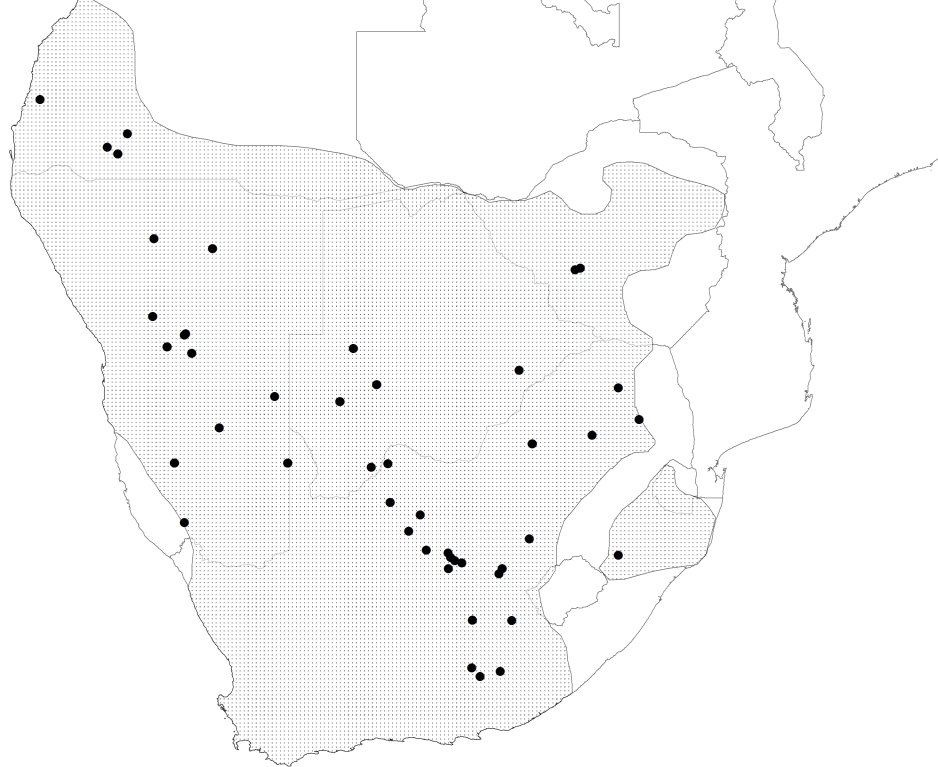

B

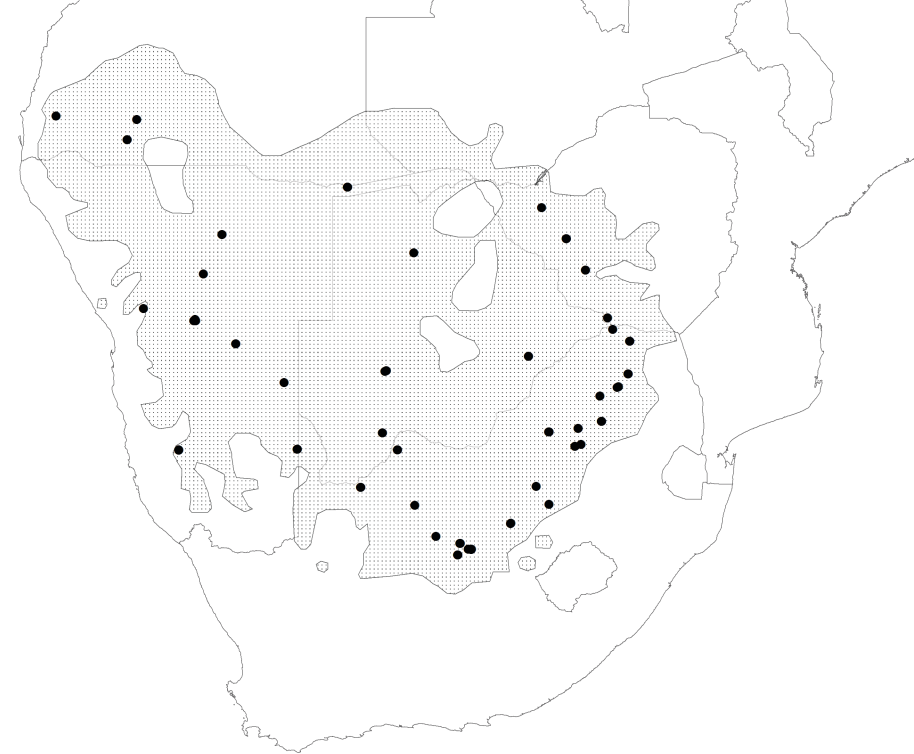

C

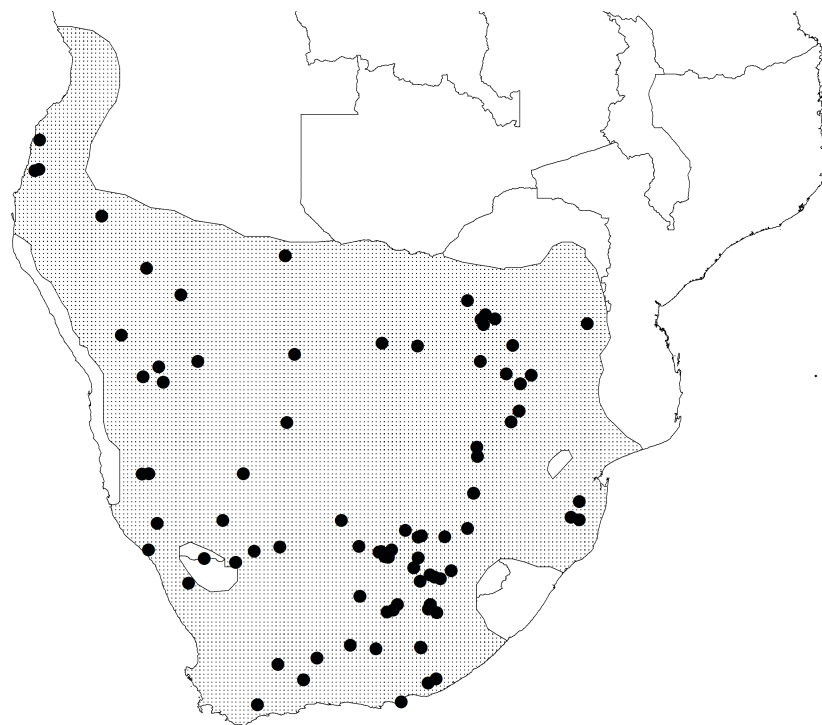

Supplemental Figure S1. Species range maps from Birdlife International ([datazone.birdlife.org/species](http://datazone.birdlife.org/species)) overlaid with the occurrence points that we used to estimate the environmental niche models in MaxEnt: A. *Curruca subcoerulea*, B. *Laniarius attrococineas*, C. *Tricholaema leucomelas*.
